# Supplementary material for: Short-Term Cooling Increases Plasma ANGPTL3 and ANGPTL8 in Young Healthy Lean Men but Not in Middle-Aged Men with Overweight and Prediabetes
Source: MDPI journal article supplement (doi:10.3390/jcm8081214), 2019-08-14
Supplement: s1 [file s1]

| <i>Clinical characteristics</i>  | Young healthy lean men |            | Middle-aged overweight prediabetic men |               |
|----------------------------------|------------------------|------------|----------------------------------------|---------------|
|                                  | SA (N=10)              | WC (N=10)  | SA (N=9)                               | WC (N=10)     |
| Age (years)                      | 24±1                   | 25±1       | 46±3 ***                               | 48±2 ***      |
| Height (m)                       | 1.75±0.02 ††           | 1.84±0.01  | 1.75±0.02 †                            | 1.81±0.02     |
| Weight (kg)                      | 65.6±3.0†              | 75.6±2.2   | 93.5±4.2 ***                           | 99.9±4.0 ***  |
| BMI (kg/m <sup>2</sup> )         | 21.4±0.7               | 22.3±0.4   | 30.4±1.1 ***                           | 30.7±1.2 ***  |
| Body fat percentage              | 23.4±1.6               | 19.4±1.5   | 31.6±1.4 **                            | 30.1±1.0 ***  |
| Thermoneutral TG (mmol/L)        | 0.91±0.18              | 0.82±0.08  | 1.58±0.26 *                            | 1.54±0.16 **  |
| Cold-induced change TG (mmol/L)  | +0.29±0.11             | +0.16±0.07 | +0.15±0.06                             | +0.21±0.06    |
| Thermoneutral FFA (mmol/L)       | 0.97±0.13              | 0.71±0.10  | 0.59±0.04 *                            | 0.49±0.07     |
| Cold-induced change FFA (mmol/L) | +0.04±0.06 ††          | +0.34±0.05 | +0.01±0.04                             | +0.11±0.06 ** |

**Table S1.** Clinical characteristics per ethnicity. Data are mean ± SEM. \*\*\* $p < 0.001$ , \*\* $p < 0.01$ , \* $p < 0.05$  within same ethnicity between study cohorts. †† $p < 0.01$ , † $p < 0.05$  between ethnicities within same study cohort. BMI = body mass index, FFA = free fatty acids, SA = South Asian, TG = triglycerides, WC = white Caucasian. Four healthy young lean subjects and 1 middle-aged overweight subject were excluded from the original cohorts due to absent plasma samples.

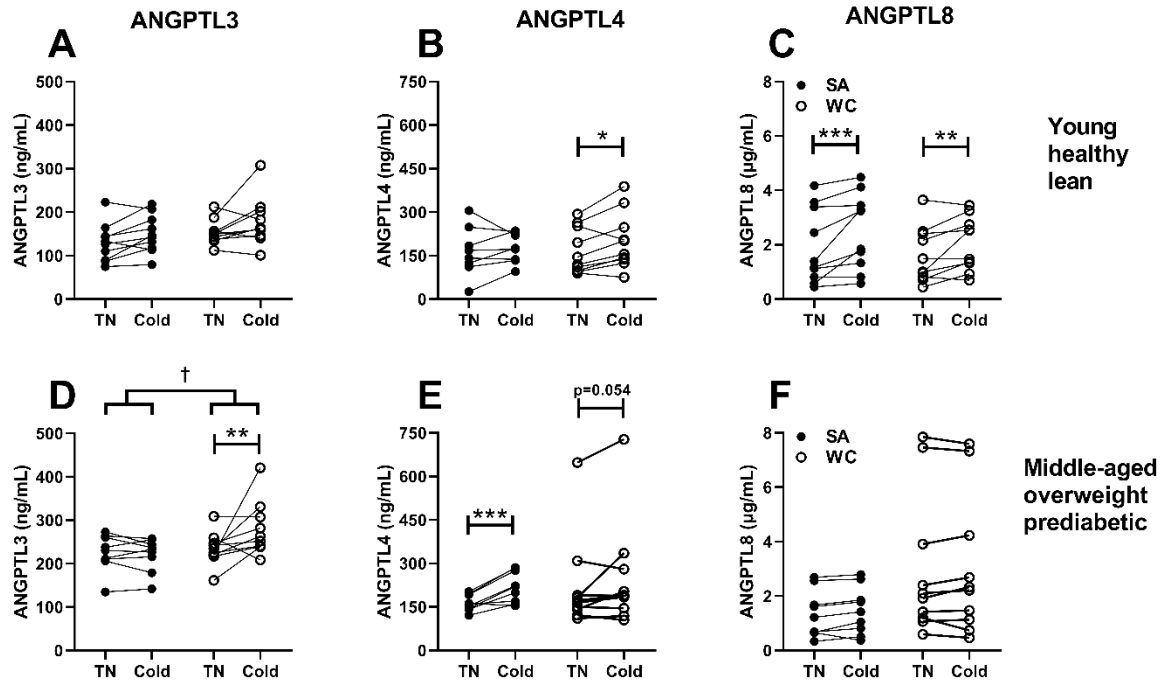

**Figure S1.** Effect of cold exposure on plasma ANGPTL3, ANGPTL4 and ANGPTL8 levels in young healthy lean South Asian (SA) and white Caucasian (WC) men (**A-C**) and SA and WC middle-aged men with overweight and prediabetes (**D-F**). Data are mean. \*\*\* $p < 0.001$ , \*\* $p < 0.01$ , \* $p < 0.05$  cold vs thermoneutrality (TN). † $p < 0.05$  cold-induced delta SA vs WC. Black circles are SA, white circles are WC.

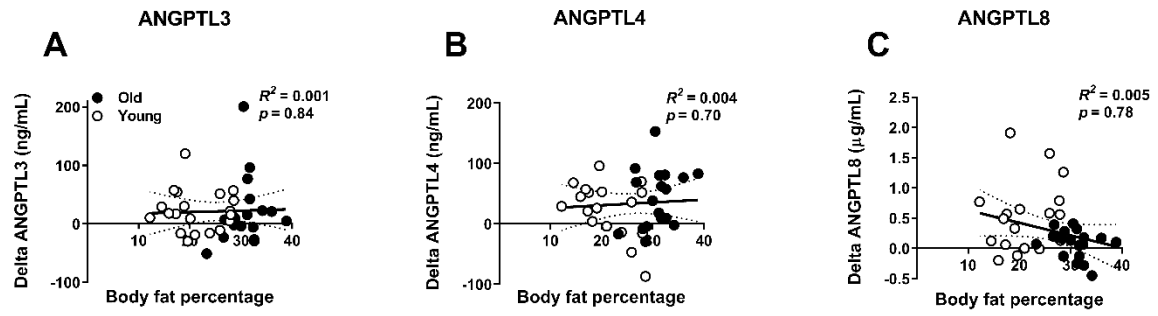

**Figure S2.** Correlation between body fat percentage and cold-induced changes in plasma ANGPTL3 (**A**), ANGPTL4 (**B**) and ANGPTL8 levels (**C**) in the young healthy lean and middle-aged overweight prediabetic cohorts combined. Dotted lines represent 95% confidence interval. Black circles are the middle-aged overweight prediabetic subjects (old) and white circles are the young healthy lean subjects (young).

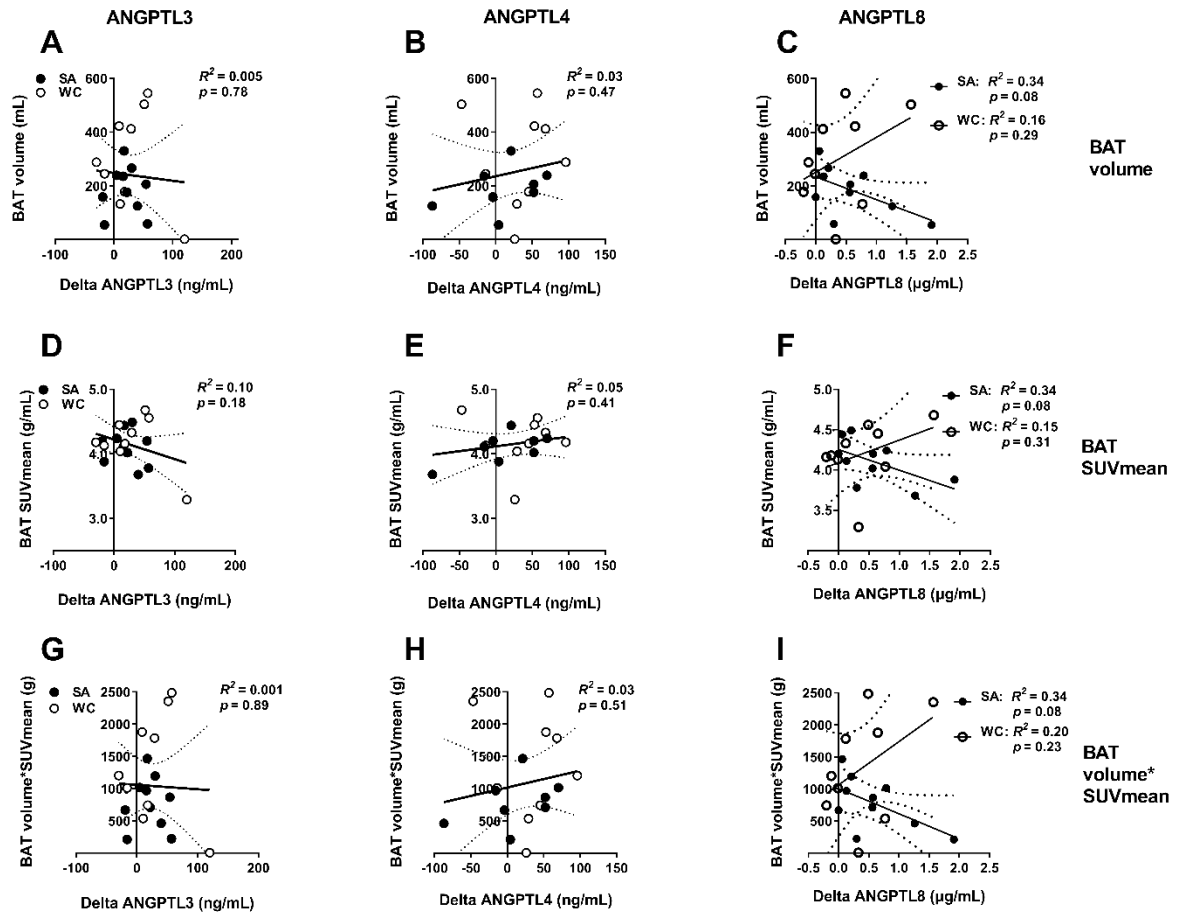

**Figure S3.** Correlation between cold-induced changes in plasma ANGPTL3, ANGPTL4 and ANGPTL8 levels and BAT volume (A-C), SUVmean (D-F) and metabolic activity, i.e., volume\*SUVmean, (G-I) in young healthy lean men. Dotted lines represent 95% confidence interval. Black circles are South Asians (SA), white circles are white Caucasians (WC).

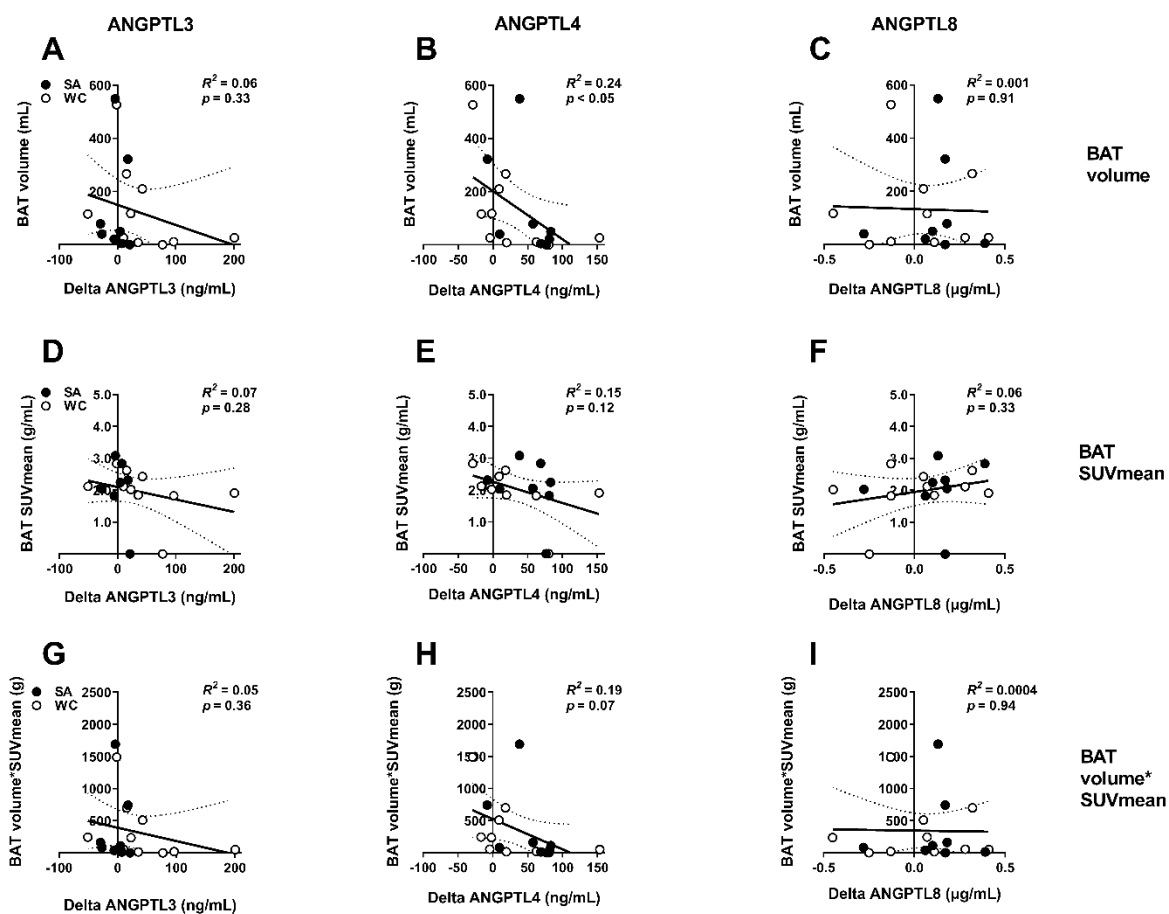

**Figure S4.** Correlation between cold-induced changes in plasma ANGPTL3, ANGPTL4 and ANGPTL8 levels and BAT volume (A-C), SUVmean (D-F) and metabolic activity, i.e., volume\*SUVmean, (G-I) in middle-aged men with overweight and prediabetes. Dotted lines represent 95% confidence interval. Black circles are South Asians (SA), white circles are white Caucasians (WC).

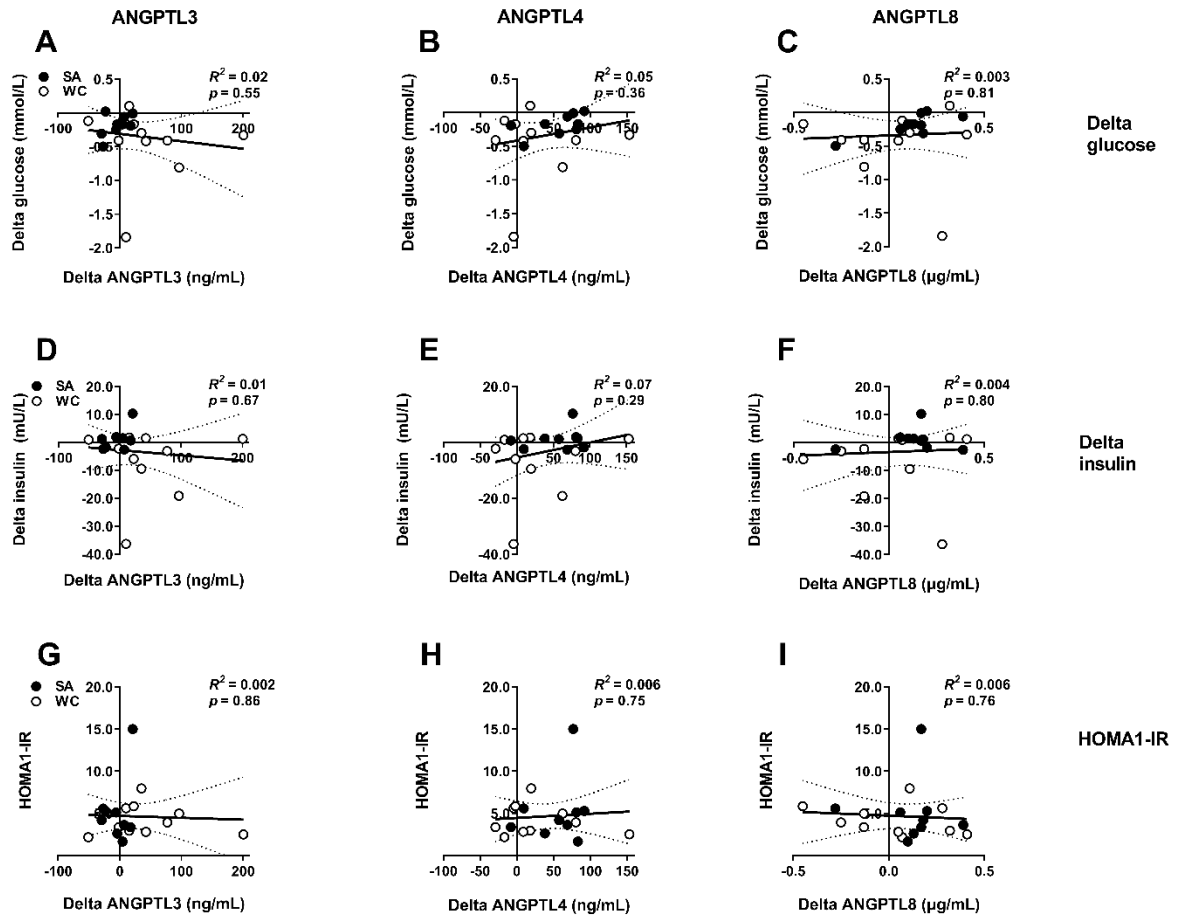

**Figure S5.** Correlation between cold-induced changes in plasma ANGPTL3, ANGPTL4 and ANGPTL8 levels and cold-induced changes in plasma glucose (A-C) and insulin (D-F) levels and HOMA1-IR (G-H) in middle-aged men with overweight and prediabetes. Dotted lines represent 95% confidence interval. Black circles are South Asians (SA), white circles are white Caucasians (WC).
